# Supplementary material
Source: publisher figshare collection journal article supplement (https://acs.figshare.com/ndownloader/files/4177930)
Supplement: Supplementary file 1 [file 4177930]

 
data_1 
 
_audit_creation_method            SHELXL-97 
_chemical_name_systematic 
; 
 ? 
; 
_chemical_name_common             ? 
_chemical_melting_point           ? 
_chemical_formula_moiety          ? 
_chemical_formula_sum 
 'C42 H46 N4 O10 Zn' 
_chemical_formula_weight          832.20 
 
loop_ 
 _atom_type_symbol 
 _atom_type_description 
 _atom_type_scat_dispersion_real 
 _atom_type_scat_dispersion_imag 
 _atom_type_scat_source 
 'C'  'C'   0.0033   0.0016 
 'International Tables Vol C Tables 4.2.6.8 and 6.1.1.4' 
 'H'  'H'   0.0000   0.0000 
 'International Tables Vol C Tables 4.2.6.8 and 6.1.1.4' 
 'N'  'N'   0.0061   0.0033 
 'International Tables Vol C Tables 4.2.6.8 and 6.1.1.4' 
 'O'  'O'   0.0106   0.0060 
 'International Tables Vol C Tables 4.2.6.8 and 6.1.1.4' 
 'Zn'  'Zn'   0.2839   1.4301 
 'International Tables Vol C Tables 4.2.6.8 and 6.1.1.4' 
 
_symmetry_cell_setting            Triclinic 
_symmetry_space_group_name_H-M    P-1 
 
loop_ 
 _symmetry_equiv_pos_as_xyz 
 'x, y, z' 
 '-x, -y, -z' 
 
_cell_length_a                    5.47840(10) 
_cell_length_b                    13.0745(4) 
_cell_length_c                    15.1085(6) 
_cell_angle_alpha                 112.077(2) 
_cell_angle_beta                  94.582(2) 
_cell_angle_gamma                 100.6590(10) 
_cell_volume                      972.18(5) 
_cell_formula_units_Z             1 
_cell_measurement_temperature     296(2) 
_cell_measurement_reflns_used     8026 
_cell_measurement_theta_min       0.840 
_cell_measurement_theta_max       0.882 
 
_exptl_crystal_description        blocks  
_exptl_crystal_colour             colorless 
_exptl_crystal_size_max           0.25 
_exptl_crystal_size_mid           0.22 
_exptl_crystal_size_min           0.18 
_exptl_crystal_density_meas       ? 
_exptl_crystal_density_diffrn     1.421 
_exptl_crystal_density_method     'not measured' 
_exptl_crystal_F_000              436 
_exptl_absorpt_coefficient_mu     0.697 
_exptl_absorpt_correction_type    none 
_exptl_absorpt_correction_T_min   ? 
_exptl_absorpt_correction_T_max   ? 
_exptl_absorpt_process_details    ? 
 
_exptl_special_details 
; 
 ? 
; 
 
_diffrn_ambient_temperature       296(2) 
_diffrn_radiation_wavelength      0.71073 
_diffrn_radiation_type            MoK\a 
_diffrn_radiation_source          'fine-focus sealed tube' 
_diffrn_radiation_monochromator   graphite 
_diffrn_measurement_device_type   'CCD area detector' 
_diffrn_measurement_method        'phi and omega scans' 
_diffrn_detector_area_resol_mean  ? 
_diffrn_standards_number          ? 
_diffrn_standards_interval_count  ? 
_diffrn_standards_interval_time   ? 
_diffrn_standards_decay_%         ? 
_diffrn_reflns_number             14419 
_diffrn_reflns_av_R_equivalents   0.0747 
_diffrn_reflns_av_sigmaI/netI     0.0398 
_diffrn_reflns_limit_h_min        -6 
_diffrn_reflns_limit_h_max        6 
_diffrn_reflns_limit_k_min        -15 
_diffrn_reflns_limit_k_max        15 
_diffrn_reflns_limit_l_min        -17 
_diffrn_reflns_limit_l_max        17 
_diffrn_reflns_theta_min          1.47 
_diffrn_reflns_theta_max          25.00 
_reflns_number_total              3398 
_reflns_number_gt                 3094 
_reflns_threshold_expression      >2sigma(I) 
 
_computing_data_collection        'Bruker SMART' 
_computing_cell_refinement        'Bruker SMART' 
_computing_data_reduction         'Bruker SAINT' 
_computing_structure_solution     'SHELXS-97 (Sheldrick, 1990)' 
_computing_structure_refinement   'SHELXL-97 (Sheldrick, 1997)' 
_computing_molecular_graphics     'Bruker SHELXTL' 
_computing_publication_material   'Bruker SHELXTL' 
 
_refine_special_details 
; 
 Refinement of F^2^ against ALL reflections.  The weighted R-factor wR and 
 goodness of fit S are based on F^2^, conventional R-factors R are based 
 on F, with F set to zero for negative F^2^. The threshold expression of 
 F^2^ > 2sigma(F^2^) is used only for calculating R-factors(gt) etc. and is 
 not relevant to the choice of reflections for refinement.  R-factors based 
 on F^2^ are statistically about twice as large as those based on F, and R- 
 factors based on ALL data will be even larger. 
; 
 
_refine_ls_structure_factor_coef  Fsqd  
_refine_ls_matrix_type            full 
_refine_ls_weighting_scheme       calc  
_refine_ls_weighting_details 
 'calc w=1/[\s^2^(Fo^2^)+(0.0423P)^2^+0.1295P] where P=(Fo^2^+2Fc^2^)/3' 
_atom_sites_solution_primary      direct 
_atom_sites_solution_secondary    difmap 
_atom_sites_solution_hydrogens    geom 
_refine_ls_hydrogen_treatment     mixed 
_refine_ls_extinction_method      none 
_refine_ls_extinction_coef        ? 
_refine_ls_number_reflns          3398 
_refine_ls_number_parameters      263 
_refine_ls_number_restraints      0 
_refine_ls_R_factor_all           0.0335 
_refine_ls_R_factor_gt            0.0304 
_refine_ls_wR_factor_ref          0.0831 
_refine_ls_wR_factor_gt           0.0813 
_refine_ls_goodness_of_fit_ref    1.078 
_refine_ls_restrained_S_all       1.078 
_refine_ls_shift/su_max           0.000 
_refine_ls_shift/su_mean          0.000 
 
loop_ 
 _atom_site_label 
 _atom_site_type_symbol 
 _atom_site_fract_x 
 _atom_site_fract_y 
 _atom_site_fract_z 
 _atom_site_U_iso_or_equiv 
 _atom_site_adp_type 
 _atom_site_occupancy 
 _atom_site_symmetry_multiplicity 
 _atom_site_calc_flag 
 _atom_site_refinement_flags 
 _atom_site_disorder_assembly 
 _atom_site_disorder_group 
Zn1 Zn 0.0000 1.0000 0.0000 0.02885(12) Uani 1 2 d S . . 
O3 O 0.8617(3) 0.57983(13) 0.28659(11) 0.0573(4) Uani 1 1 d . . . 
O4 O 0.2738(3) 0.66726(12) 0.48339(10) 0.0509(4) Uani 1 1 d . . . 
O1 O 0.2516(2) 0.98349(10) 0.10366(8) 0.0304(3) Uani 1 1 d . . . 
O2 O 0.0093(2) 0.99060(13) 0.21640(10) 0.0472(4) Uani 1 1 d . . . 
O5 O 0.2432(2) 0.94863(11) -0.10062(9) 0.0340(3) Uani 1 1 d . . . 
H5A H 0.1778 0.9620 -0.1483 0.051 Uiso 1 1 d R . . 
N1 N 0.5949(3) 0.65239(13) 0.39257(11) 0.0364(4) Uani 1 1 d . . . 
N2 N -0.1739(3) 0.81353(13) -0.04170(10) 0.0335(3) Uani 1 1 d . . . 
C9 C 0.5638(5) 0.34891(18) 0.28225(16) 0.0528(6) Uani 1 1 d . . . 
H9 H 0.6893 0.3322 0.2448 0.063 Uiso 1 1 calc R . . 
C10 C 0.3914(5) 0.2646(2) 0.29211(17) 0.0621(7) Uani 1 1 d . . . 
H10 H 0.4001 0.1895 0.2604 0.075 Uiso 1 1 calc R . . 
C11 C 0.2055(5) 0.2890(2) 0.34804(17) 0.0598(7) Uani 1 1 d . . . 
H11 H 0.0906 0.2299 0.3527 0.072 Uiso 1 1 calc R . . 
C12 C 0.1866(4) 0.40013(19) 0.39753(16) 0.0505(5) Uani 1 1 d . . . 
H12 H 0.0630 0.4169 0.4359 0.061 Uiso 1 1 calc R . . 
C13 C 0.3593(4) 0.48451(16) 0.38722(13) 0.0391(4) Uani 1 1 d . . . 
C8 C 0.5433(4) 0.45952(17) 0.33015(13) 0.0398(5) Uani 1 1 d . . . 
C7 C 0.6926(4) 0.56618(17) 0.33086(14) 0.0395(4) Uani 1 1 d . . . 
C14 C 0.3919(4) 0.61022(17) 0.42920(13) 0.0377(4) Uani 1 1 d . . . 
C6 C 0.6874(4) 0.77235(16) 0.41266(14) 0.0390(4) Uani 1 1 d . . . 
H6A H 0.8474 0.7824 0.3901 0.047 Uiso 1 1 calc R . . 
H6B H 0.7169 0.8156 0.4821 0.047 Uiso 1 1 calc R . . 
C5 C 0.5065(3) 0.81991(15) 0.36496(12) 0.0316(4) Uani 1 1 d . . . 
H5 H 0.3567 0.8216 0.3963 0.038 Uiso 1 1 calc R . . 
C4 C 0.4228(4) 0.74748(16) 0.25678(13) 0.0376(4) Uani 1 1 d . . . 
H4B H 0.5696 0.7413 0.2249 0.045 Uiso 1 1 calc R . . 
H4A H 0.3350 0.6717 0.2475 0.045 Uiso 1 1 calc R . . 
C3 C 0.2494(3) 0.79976(15) 0.21128(13) 0.0361(4) Uani 1 1 d . . . 
H3A H 0.0963 0.8000 0.2394 0.043 Uiso 1 1 calc R . . 
H3B H 0.2033 0.7538 0.1423 0.043 Uiso 1 1 calc R . . 
C2 C 0.3762(3) 0.92101(15) 0.22729(12) 0.0312(4) Uani 1 1 d . . . 
H2 H 0.5267 0.9190 0.1963 0.037 Uiso 1 1 calc R . . 
C16 C 0.4581(4) 0.99354(15) 0.33572(13) 0.0378(4) Uani 1 1 d . . . 
H16A H 0.5454 1.0695 0.3453 0.045 Uiso 1 1 calc R . . 
H16B H 0.3107 0.9992 0.3672 0.045 Uiso 1 1 calc R . . 
C15 C 0.6316(3) 0.94123(15) 0.38127(13) 0.0353(4) Uani 1 1 d . . . 
H15A H 0.7851 0.9415 0.3534 0.042 Uiso 1 1 calc R . . 
H15B H 0.6768 0.9870 0.4503 0.042 Uiso 1 1 calc R . . 
C1 C 0.1986(3) 0.96914(15) 0.18000(12) 0.0309(4) Uani 1 1 d . . . 
C19 C -0.3410(4) 0.58541(18) -0.07800(16) 0.0538(6) Uani 1 1 d . . . 
H19 H -0.3961 0.5092 -0.0894 0.065 Uiso 1 1 calc R . . 
C18 C -0.1309(4) 0.62200(18) -0.11080(17) 0.0533(6) Uani 1 1 d . . . 
H18 H -0.0415 0.5708 -0.1460 0.064 Uiso 1 1 calc R . . 
C17 C -0.0534(4) 0.73583(17) -0.09100(15) 0.0449(5) Uani 1 1 d . . . 
H17 H 0.0908 0.7599 -0.1132 0.054 Uiso 1 1 calc R . . 
C21 C -0.3804(4) 0.77601(17) -0.01137(14) 0.0439(5) Uani 1 1 d . . . 
H21 H -0.4690 0.8283 0.0225 0.053 Uiso 1 1 calc R . . 
C20 C -0.4688(4) 0.66404(19) -0.02769(17) 0.0565(6) Uani 1 1 d . . . 
H20 H -0.6135 0.6417 -0.0050 0.068 Uiso 1 1 calc R . . 
H5B H 0.394(4) 0.9668(19) -0.0961(15) 0.051(7) Uiso 1 1 d . . . 
 
loop_ 
 _atom_site_aniso_label 
 _atom_site_aniso_U_11 
 _atom_site_aniso_U_22 
 _atom_site_aniso_U_33 
 _atom_site_aniso_U_23 
 _atom_site_aniso_U_13 
 _atom_site_aniso_U_12 
Zn1 0.02569(17) 0.03687(19) 0.03021(18) 0.01711(13) 0.00940(11) 0.01187(12) 
O3 0.0585(10) 0.0619(10) 0.0630(10) 0.0288(8) 0.0304(8) 0.0242(8) 
O4 0.0598(9) 0.0510(9) 0.0501(9) 0.0214(7) 0.0254(7) 0.0224(7) 
O1 0.0263(6) 0.0419(7) 0.0307(6) 0.0210(6) 0.0082(5) 0.0105(5) 
O2 0.0358(7) 0.0806(11) 0.0479(8) 0.0413(8) 0.0216(6) 0.0275(7) 
O5 0.0276(7) 0.0451(8) 0.0375(7) 0.0223(6) 0.0124(5) 0.0121(6) 
N1 0.0435(9) 0.0351(9) 0.0395(9) 0.0211(7) 0.0120(7) 0.0150(7) 
N2 0.0315(8) 0.0373(9) 0.0329(8) 0.0139(7) 0.0070(6) 0.0104(7) 
C9 0.0701(15) 0.0437(13) 0.0463(12) 0.0152(10) 0.0057(10) 0.0246(11) 
C10 0.0906(19) 0.0371(13) 0.0531(14) 0.0147(11) -0.0058(13) 0.0163(12) 
C11 0.0753(17) 0.0415(13) 0.0586(15) 0.0270(11) -0.0088(13) -0.0027(12) 
C12 0.0547(13) 0.0521(14) 0.0483(12) 0.0282(11) 0.0037(10) 0.0058(10) 
C13 0.0473(12) 0.0388(11) 0.0350(10) 0.0192(9) 0.0025(8) 0.0108(9) 
C8 0.0484(12) 0.0401(11) 0.0353(10) 0.0170(9) 0.0037(8) 0.0175(9) 
C7 0.0430(11) 0.0456(12) 0.0383(11) 0.0215(9) 0.0098(8) 0.0185(9) 
C14 0.0439(11) 0.0428(11) 0.0337(10) 0.0209(9) 0.0077(8) 0.0142(9) 
C6 0.0438(11) 0.0378(11) 0.0405(11) 0.0215(9) 0.0049(8) 0.0099(9) 
C5 0.0342(10) 0.0336(10) 0.0322(9) 0.0166(8) 0.0092(7) 0.0112(8) 
C4 0.0445(11) 0.0316(10) 0.0371(10) 0.0142(8) 0.0041(8) 0.0098(8) 
C3 0.0373(10) 0.0358(10) 0.0332(10) 0.0128(8) 0.0026(8) 0.0072(8) 
C2 0.0283(9) 0.0416(10) 0.0326(9) 0.0220(8) 0.0106(7) 0.0111(8) 
C16 0.0451(11) 0.0297(10) 0.0385(11) 0.0153(8) 0.0010(8) 0.0072(8) 
C15 0.0412(10) 0.0339(10) 0.0304(10) 0.0141(8) 0.0012(7) 0.0068(8) 
C1 0.0279(9) 0.0333(10) 0.0334(10) 0.0167(8) 0.0046(7) 0.0048(7) 
C19 0.0675(15) 0.0369(12) 0.0580(14) 0.0204(11) 0.0145(11) 0.0094(10) 
C18 0.0586(14) 0.0406(12) 0.0634(14) 0.0171(11) 0.0187(11) 0.0219(10) 
C17 0.0433(12) 0.0423(12) 0.0552(13) 0.0204(10) 0.0198(9) 0.0170(9) 
C21 0.0448(12) 0.0395(11) 0.0462(11) 0.0139(9) 0.0181(9) 0.0089(9) 
C20 0.0616(15) 0.0469(13) 0.0615(14) 0.0220(11) 0.0284(11) 0.0050(11) 
 
_geom_special_details 
; 
 All esds (except the esd in the dihedral angle between two l.s. planes) 
 are estimated using the full covariance matrix.  The cell esds are taken 
 into account individually in the estimation of esds in distances, angles 
 and torsion angles; correlations between esds in cell parameters are only 
 used when they are defined by crystal symmetry.  An approximate (isotropic) 
 treatment of cell esds is used for estimating esds involving l.s. planes. 
; 
 
loop_ 
 _geom_bond_atom_site_label_1 
 _geom_bond_atom_site_label_2 
 _geom_bond_distance 
 _geom_bond_site_symmetry_2 
 _geom_bond_publ_flag 
Zn1 O1 2.1019(11) 2_575 ? 
Zn1 O1 2.1019(11) . ? 
Zn1 O5 2.1036(12) . ? 
Zn1 O5 2.1036(12) 2_575 ? 
Zn1 N2 2.2669(15) 2_575 ? 
Zn1 N2 2.2669(15) . ? 
O3 C7 1.210(2) . ? 
O4 C14 1.204(2) . ? 
O1 C1 1.283(2) . ? 
O2 C1 1.241(2) . ? 
O5 H5A 0.8683 . ? 
O5 H5B 0.81(2) . ? 
N1 C7 1.393(2) . ? 
N1 C14 1.396(2) . ? 
N1 C6 1.460(2) . ? 
N2 C21 1.333(2) . ? 
N2 C17 1.334(2) . ? 
C9 C10 1.375(3) . ? 
C9 C8 1.384(3) . ? 
C9 H9 0.9300 . ? 
C10 C11 1.381(4) . ? 
C10 H10 0.9300 . ? 
C11 C12 1.390(3) . ? 
C11 H11 0.9300 . ? 
C12 C13 1.379(3) . ? 
C12 H12 0.9300 . ? 
C13 C8 1.384(3) . ? 
C13 C14 1.492(3) . ? 
C8 C7 1.476(3) . ? 
C6 C5 1.529(2) . ? 
C6 H6A 0.9700 . ? 
C6 H6B 0.9700 . ? 
C5 C15 1.524(3) . ? 
C5 C4 1.528(3) . ? 
C5 H5 0.9800 . ? 
C4 C3 1.527(2) . ? 
C4 H4B 0.9700 . ? 
C4 H4A 0.9700 . ? 
C3 C2 1.527(2) . ? 
C3 H3A 0.9700 . ? 
C3 H3B 0.9700 . ? 
C2 C1 1.519(2) . ? 
C2 C16 1.530(2) . ? 
C2 H2 0.9800 . ? 
C16 C15 1.528(2) . ? 
C16 H16A 0.9700 . ? 
C16 H16B 0.9700 . ? 
C15 H15A 0.9700 . ? 
C15 H15B 0.9700 . ? 
C19 C18 1.366(3) . ? 
C19 C20 1.374(3) . ? 
C19 H19 0.9300 . ? 
C18 C17 1.377(3) . ? 
C18 H18 0.9300 . ? 
C17 H17 0.9300 . ? 
C21 C20 1.373(3) . ? 
C21 H21 0.9300 . ? 
C20 H20 0.9300 . ? 
 
loop_ 
 _geom_angle_atom_site_label_1 
 _geom_angle_atom_site_label_2 
 _geom_angle_atom_site_label_3 
 _geom_angle 
 _geom_angle_site_symmetry_1 
 _geom_angle_site_symmetry_3 
 _geom_angle_publ_flag 
O1 Zn1 O1 180.00(6) 2_575 . ? 
O1 Zn1 O5 91.26(5) 2_575 . ? 
O1 Zn1 O5 88.74(5) . . ? 
O1 Zn1 O5 88.74(5) 2_575 2_575 ? 
O1 Zn1 O5 91.26(5) . 2_575 ? 
O5 Zn1 O5 180.0 . 2_575 ? 
O1 Zn1 N2 85.40(5) 2_575 2_575 ? 
O1 Zn1 N2 94.60(5) . 2_575 ? 
O5 Zn1 N2 92.49(5) . 2_575 ? 
O5 Zn1 N2 87.51(5) 2_575 2_575 ? 
O1 Zn1 N2 94.60(5) 2_575 . ? 
O1 Zn1 N2 85.40(5) . . ? 
O5 Zn1 N2 87.51(5) . . ? 
O5 Zn1 N2 92.49(5) 2_575 . ? 
N2 Zn1 N2 180.00(8) 2_575 . ? 
C1 O1 Zn1 126.30(11) . . ? 
Zn1 O5 H5A 101.5 . . ? 
Zn1 O5 H5B 131.7(16) . . ? 
H5A O5 H5B 107.1 . . ? 
C7 N1 C14 112.14(16) . . ? 
C7 N1 C6 123.64(16) . . ? 
C14 N1 C6 124.17(16) . . ? 
C21 N2 C17 116.60(17) . . ? 
C21 N2 Zn1 123.55(12) . . ? 
C17 N2 Zn1 119.49(13) . . ? 
C10 C9 C8 117.4(2) . . ? 
C10 C9 H9 121.3 . . ? 
C8 C9 H9 121.3 . . ? 
C9 C10 C11 121.5(2) . . ? 
C9 C10 H10 119.2 . . ? 
C11 C10 H10 119.2 . . ? 
C10 C11 C12 121.3(2) . . ? 
C10 C11 H11 119.4 . . ? 
C12 C11 H11 119.4 . . ? 
C13 C12 C11 117.1(2) . . ? 
C13 C12 H12 121.5 . . ? 
C11 C12 H12 121.5 . . ? 
C12 C13 C8 121.41(19) . . ? 
C12 C13 C14 130.89(19) . . ? 
C8 C13 C14 107.70(17) . . ? 
C9 C8 C13 121.3(2) . . ? 
C9 C8 C7 129.9(2) . . ? 
C13 C8 C7 108.79(17) . . ? 
O3 C7 N1 125.16(19) . . ? 
O3 C7 C8 129.08(19) . . ? 
N1 C7 C8 105.74(16) . . ? 
O4 C14 N1 125.04(18) . . ? 
O4 C14 C13 129.37(19) . . ? 
N1 C14 C13 105.59(16) . . ? 
N1 C6 C5 113.51(15) . . ? 
N1 C6 H6A 108.9 . . ? 
C5 C6 H6A 108.9 . . ? 
N1 C6 H6B 108.9 . . ? 
C5 C6 H6B 108.9 . . ? 
H6A C6 H6B 107.7 . . ? 
C15 C5 C4 110.19(14) . . ? 
C15 C5 C6 109.36(14) . . ? 
C4 C5 C6 112.46(15) . . ? 
C15 C5 H5 108.2 . . ? 
C4 C5 H5 108.2 . . ? 
C6 C5 H5 108.2 . . ? 
C3 C4 C5 110.83(14) . . ? 
C3 C4 H4B 109.5 . . ? 
C5 C4 H4B 109.5 . . ? 
C3 C4 H4A 109.5 . . ? 
C5 C4 H4A 109.5 . . ? 
H4B C4 H4A 108.1 . . ? 
C4 C3 C2 111.43(14) . . ? 
C4 C3 H3A 109.3 . . ? 
C2 C3 H3A 109.3 . . ? 
C4 C3 H3B 109.3 . . ? 
C2 C3 H3B 109.3 . . ? 
H3A C3 H3B 108.0 . . ? 
C1 C2 C3 109.65(14) . . ? 
C1 C2 C16 112.02(14) . . ? 
C3 C2 C16 109.91(14) . . ? 
C1 C2 H2 108.4 . . ? 
C3 C2 H2 108.4 . . ? 
C16 C2 H2 108.4 . . ? 
C15 C16 C2 110.58(14) . . ? 
C15 C16 H16A 109.5 . . ? 
C2 C16 H16A 109.5 . . ? 
C15 C16 H16B 109.5 . . ? 
C2 C16 H16B 109.5 . . ? 
H16A C16 H16B 108.1 . . ? 
C5 C15 C16 111.65(14) . . ? 
C5 C15 H15A 109.3 . . ? 
C16 C15 H15A 109.3 . . ? 
C5 C15 H15B 109.3 . . ? 
C16 C15 H15B 109.3 . . ? 
H15A C15 H15B 108.0 . . ? 
O2 C1 O1 123.88(16) . . ? 
O2 C1 C2 118.29(15) . . ? 
O1 C1 C2 117.83(15) . . ? 
C18 C19 C20 118.3(2) . . ? 
C18 C19 H19 120.8 . . ? 
C20 C19 H19 120.8 . . ? 
C19 C18 C17 119.0(2) . . ? 
C19 C18 H18 120.5 . . ? 
C17 C18 H18 120.5 . . ? 
N2 C17 C18 123.57(19) . . ? 
N2 C17 H17 118.2 . . ? 
C18 C17 H17 118.2 . . ? 
N2 C21 C20 123.29(19) . . ? 
N2 C21 H21 118.4 . . ? 
C20 C21 H21 118.4 . . ? 
C21 C20 C19 119.2(2) . . ? 
C21 C20 H20 120.4 . . ? 
C19 C20 H20 120.4 . . ? 
 
_diffrn_measured_fraction_theta_max    0.989 
_diffrn_reflns_theta_full              25.00 
_diffrn_measured_fraction_theta_full   0.989 
_refine_diff_density_max    0.251 
_refine_diff_density_min   -0.409 
_refine_diff_density_rms    0.058 
